# Supplementary material for: Catalytic hydrogenation of CO2 with unsymmetric N-heterocyclic carbene–nitrogen–phosphine ruthenium complexes
Source: Royal Society of Chemistry journal article supplement (doi:10.1039/d1cy01713f), 2021-01-01
Supplement: d1cy01713f1.pdf [file d1cy01713f1.pdf]

Electronic Supplementary Information

**Catalytic Hydrogenation of CO<sub>2</sub> by Unsymmetric N-Heterocyclic  
Carbene-Nitrogen-Phosphine Ruthenium Complexes**

Li Ji,<sup>‡</sup> Tianhua Cui,<sup>‡</sup> Xufeng Nie, Yanling Zheng, Xueli Zheng, Haiyan Fu, Maolin Yuan, Hua Chen, Jiaqi Xu,<sup>\*</sup> and Ruixiang Li<sup>\*</sup>

Key Laboratory of Green Chemistry and Technology of Ministry of Education, College of Chemistry, Sichuan University, Chengdu, Sichuan 610064, China

E-mail: jqxu@scu.edu.cn

liruixiang@scu.edu.cn

<sup>‡</sup> These authors contributed equally to this work.

**General:** Unless otherwise noted, the manipulations, which are sensitive to moisture or air, were performed in an argon-filled glove box VIGOR or treated by standard Schlenk techniques. NMR spectra were recorded on a Bruker AVII-400 spectrometer at 400 MHz ( $^1\text{H}$  NMR), and 162 MHz ( $^{31}\text{P}$  NMR). Chemical shifts were reported in ppm down field from internal  $\text{Me}_4\text{Si}$  and external 85%  $\text{H}_3\text{PO}_4$ , respectively.

All the solvents used for reactions were distilled under argon after drying over an appropriate drying agent. All other commercially available reagents were purchased from Aladdin, Adamas, Aldrich and Alfa Aesar Chemical Company.

We thank Comprehensive Training Platform of the Specialized Laboratory in the College of Chemistry at Sichuan University and Analytical & Testing Center of Sichuan University for the support. We would like to thank Dr. Daibing Luo and Dr. Daichuan Ma from the Analytical & Testing Center of Sichuan University for X-ray diffraction work and single crystal analysis. We thank Ms. Yue Qi of the comprehensive training platform of the Specialized Laboratory in the College of Chemistry at Sichuan University for compound testing.

### Preparation of Ligands and Ru Complexes:

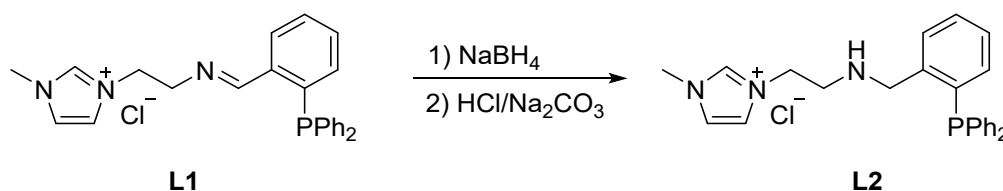

**Scheme S1.** Synthesis of 3-(2-([2-(diphenylphosphino)benzyl]amino)ethyl)-1-methyl-1H-imidazol-3-ium chloride [CN(H)P] ligand (**L2** ligand).

**L1** ligand 3-(2-([2-(diphenylphosphino)benzylidene]amino)ethyl)-1-methyl-1H-imidazol-3-ium chloride was prepared according to the previous literature.<sup>1</sup> 1.5 eq of  $\text{NaBH}_4$  (285 mg, 7.5 mmol) was slowly added into the MeOH solution of 3-(2-([2-(diphenylphosphino)benzylidene]amino)ethyl)-1-methyl-1H-imidazol-3-ium chloride **L1** ligand (1.985 g, 5 mmol) in ice bath and stirred at room temperature for 3 h. After the reaction, the solution with excessive  $\text{NaBH}_4$  was quenched with dilute hydrochloric acid, followed by 2 eq  $\text{NaHCO}_3$  to neutralize the solution. The aqueous solution was extracted with  $\text{CH}_2\text{Cl}_2$  (3×15 ml). The organic phase was separated, dried with  $\text{Na}_2\text{SO}_4$  and filtered. At last, the filtrate was evaporated under vacuum to afford a pale yellow viscous liquid (1.59 g, yield 80%).

$^1\text{H}$  NMR (400 MHz,  $\text{DMSO}-d_6$ )  $\delta$  (ppm) 9.23 (s, 1H), 7.77-7.64 (m, 2H), 7.40 (dq,  $J = 3.2, 1.4$  Hz, 7H), 6.76 (ddd,  $J = 7.7, 4.4, 1.3$  Hz, 1H), 4.17 (t,  $J = 5.6$  Hz, 2H), 3.86 (s, 3H), 3.83 (d,  $J = 2.2$  Hz, 2H), 2.80 (t,  $J = 5.7$  Hz, 2H).  $^{31}\text{P}$  NMR ( $\text{DMSO}-d_6$ , 162.0 MHz)  $\delta$  (ppm) -17.1.

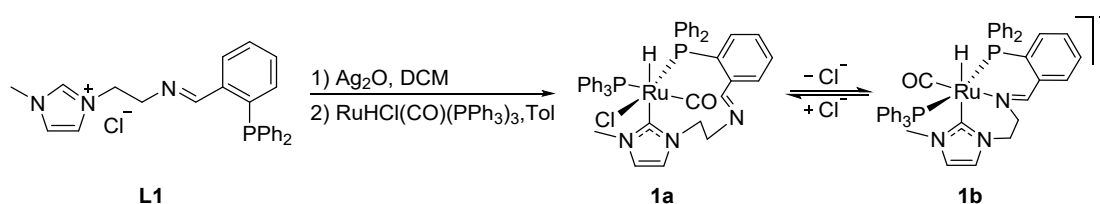

**Scheme S2.** Synthesis of CNP ligand chelated complex **1**.<sup>2</sup>

Ru-CNP complex **1** were prepared according to the previous literature.<sup>1</sup> The mixture of ligand **L1** and Ag<sub>2</sub>O in dichloromethane was stirred at room temperature for 2 h, and then the dichloromethane solution was filtered. The filtrate was added to anhydrous diethyl ether to precipitate Ag complex. Subsequently, the silver complex reacted with RuHCl(CO)(PPh<sub>3</sub>)<sub>3</sub> in toluene at 60 °C to form the desired product as a pale yellow powder in 71% yield. The pure complex **1a** could be isolated by column chromatography, while complex **1b** was obtained by refluxing in THF and purified by column chromatography. However, when pure complex **1a** (or **1b**) was dissolved in the solution, it would transform into complex **1b** (or **1a**) and reach the equilibrium (Figure S13-14).

<sup>1</sup>H NMR (DMSO-*d*<sub>6</sub>, 400.1 MHz,  $\delta$ ): 8.64 (s), 8.63 (s), 7.83 (m), 7.49 (m), 6.8–7.4 (m), 6.77–7.64 (m), 6.58 (s), 6.45 (t), 6.20 (t), 4.39–4.52 (m), 4.02 (d), 3.99 (d, 1H, *J* = 16.0 Hz), 3.89 (s), 3.61 (d), 3.47 (t), 2.96 (s), 2.59 (t), 2.31 (t), –7.53 (dd), –11.96 (dd). <sup>31</sup>P NMR (DMSO-*d*<sub>6</sub>, 162.0 MHz,  $\delta$ ): 47.4 (d, *JP-P* = 256.5 Hz), 41.3 (dd, *JP-P* = 30.4 Hz), 42.5 (d, *JP-P* = 256.5 Hz), 36.4 (dd, *JP-P* = 30.4 Hz).

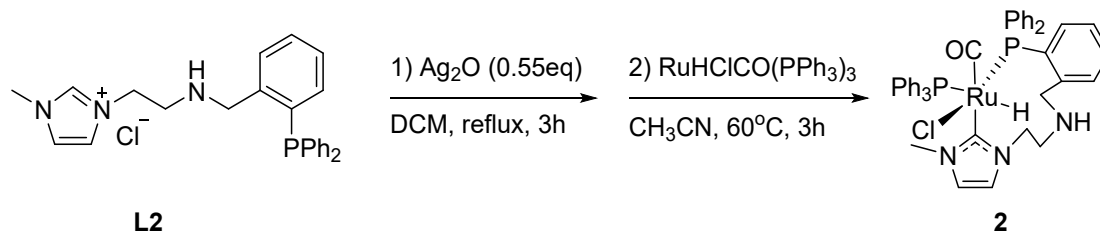

**Scheme S3.** Synthesis of CN(H)P ligand chelated complex **2**.

**L2** ligand (870.2 mg, 2 mmol), silver oxide (255.2 mg, 1.1 mmol) and DCM (10 mL) were successively added into a 50 mL two-necked flask under the protection of nitrogen, and the reaction was stopped after being stirred in the reflux for 2 h without light. The insoluble matter was filtered to obtain a brown clear solution. Then 30 mL anhydrous diethyl ether was added and the white solid was precipitated out. The mother liquor was filtered out, and the solid was washed with ether for three times (10 mL×3), and the product **L2-Ag** was dried in vacuum (0.890g yield, 82% yield).

**L2-Ag** complex (54.1 mg, 0.1 mmol) and ruthenium precursor RuHCl(CO)(PPh<sub>3</sub>)<sub>3</sub> (95.1 mg, 0.1 mmol) were added to a 50 mL dry two-necked flask under the protection of nitrogen, followed by acetonitrile (8 mL) and stirred at 60 °C for 3 h. Then the solution was cooled to room temperature, the insoluble matter was filtered out. The filtrate was drained under reduced pressure, the obtained solid was dissolved with 5 mL DCM, and then precipitated with 20 mL n-hexane. The crude product was eluted by

neutral Al<sub>2</sub>O<sub>3</sub> column chromatography with a 10:1 eluent of CH<sub>2</sub>Cl<sub>2</sub>: CH<sub>3</sub>OH, and the yield of complex **2** was 27.7 mg (35% yield).

<sup>1</sup>H NMR (400 MHz, DMSO-d<sub>6</sub>) δ (ppm) 7.78-7.51 (m, 12H), 7.49-7.37 (m, 19H), 7.35-7.26 (m, 17H), 7.16 (dt, J = 4.4, 2.8 Hz, 4H), 6.95 (t, J = 8.0 Hz, 1H), 6.46 (t, J = 8.8 Hz, 2H), 4.22 (t, J = 6.6 Hz, 2H), 3.85-3.78 (m, 2H), 2.99 (s, 2H), 2.81 (s, 3H), -6.94 (dd, J = 97.2, 28.7 Hz, 1H). <sup>31</sup>P NMR (162 MHz, DMSO-d<sub>6</sub>) δ (ppm) 44.89 (d, J = 15.1 Hz), 17.97. HRMS (ESI-TOF) m/z: [M-Cl]<sup>+</sup> Calcd for C<sub>44</sub>H<sub>42</sub>N<sub>3</sub>OP<sub>2</sub>Ru: 792.1841, found: 792.1848.

### Catalytic hydrogenation of CO<sub>2</sub> with H<sub>2</sub>:

Catalytic CO<sub>2</sub> hydrogenation was carried out in a Hastelloy Autoclave Reactor system equipped with a 25 mL cylinder. The catalyst (0.02-1 μmol) was dissolved in a degassed aqueous solution (5 mL) of CsOH (10 mmol) along with the addition of 1 mL THF. The reactor was pressurized with 5 MPa of CO<sub>2</sub>/H<sub>2</sub>(1:1) and heated at 100-200 °C for the appropriate time (4-96 h). 50-200 μL of dimethylformamide was added as internal standard, while 500 μL D<sub>2</sub>O was added as the solvent. Then, the formate was quantified by <sup>1</sup>H NMR spectroscopy.

The conditions to test the effects of different salts (KNO<sub>3</sub>, NaBF<sub>4</sub>, NaOAc, CF<sub>3</sub>COONa, etc.) were same to the general conditions, except that certain amount of salt (salt:cat = 20000-100000) was added.

To uncover the underlying mechanism, stoichiometric reactions were conducted with 30 μmol Ru-CNP complex **1** and 1 mmol CsOH under 5 MPa of CO<sub>2</sub>/H<sub>2</sub> (CO<sub>2</sub> : H<sub>2</sub> = 1 : 1) in the mixture solvent of CD<sub>3</sub>CN and D<sub>2</sub>O (1.5mL: 0.5mL) at 140 °C for 2 h, in which the intermediates were monitored by in-situ NMR. In the stoichiometric reactions, the amount of Ru-CNP complex **1** was increased to enhance the possibility of capturing intermediates.

### Mercury poisoning experiments:

The mercury poisoning experiments were carried out in a Hastelloy Autoclave Reactor system equipped with a 25 mL cylinder, the catalyst (0.1 μmol) was dissolved in a degassed aqueous solution (5 mL) of CsOH (10 mmol) along with the addition of 1 mL THF and 9 μL Hg. The reactor was pressurized with 5 MPa of CO<sub>2</sub>/H<sub>2</sub>(1:1) and heated at 140 °C for 4 h. 100 μL of dimethylformamide was added as internal standard, while 500 μL D<sub>2</sub>O was added as the solvent. Then, the formate was quantified by <sup>1</sup>H NMR spectroscopy.

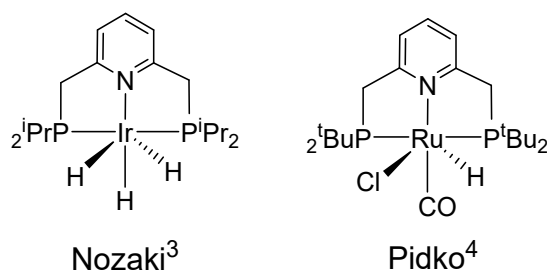

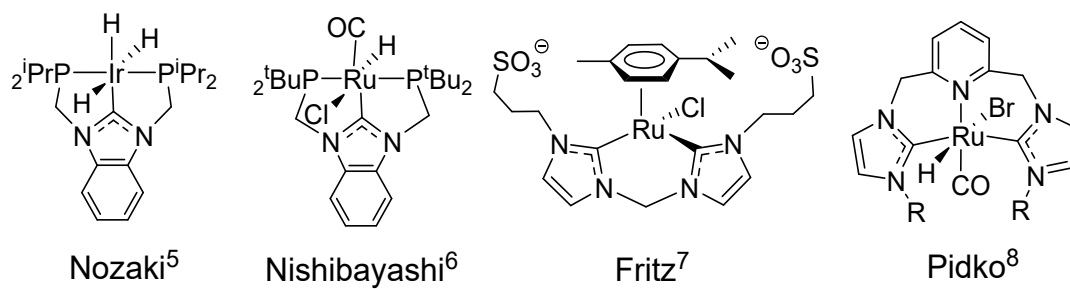

**Scheme S5.** Representative catalysts based on NHC ligands.<sup>5-8</sup>

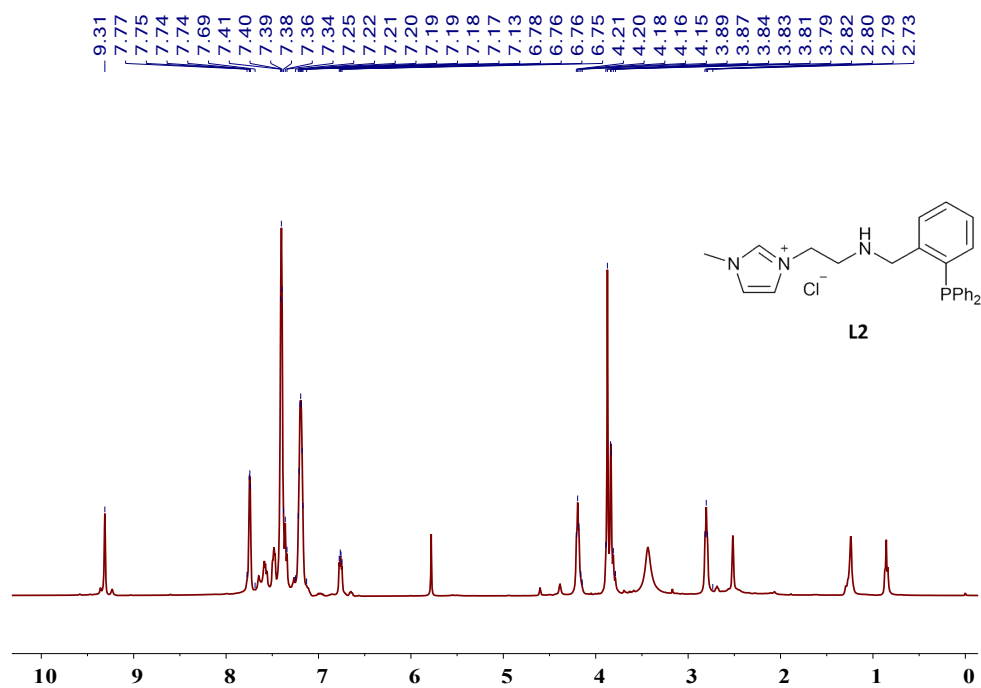

**Figure S1.** <sup>1</sup>H NMR spectrum of **L2** ligand (400.1 MHz, DMSO-*d*<sub>6</sub>).

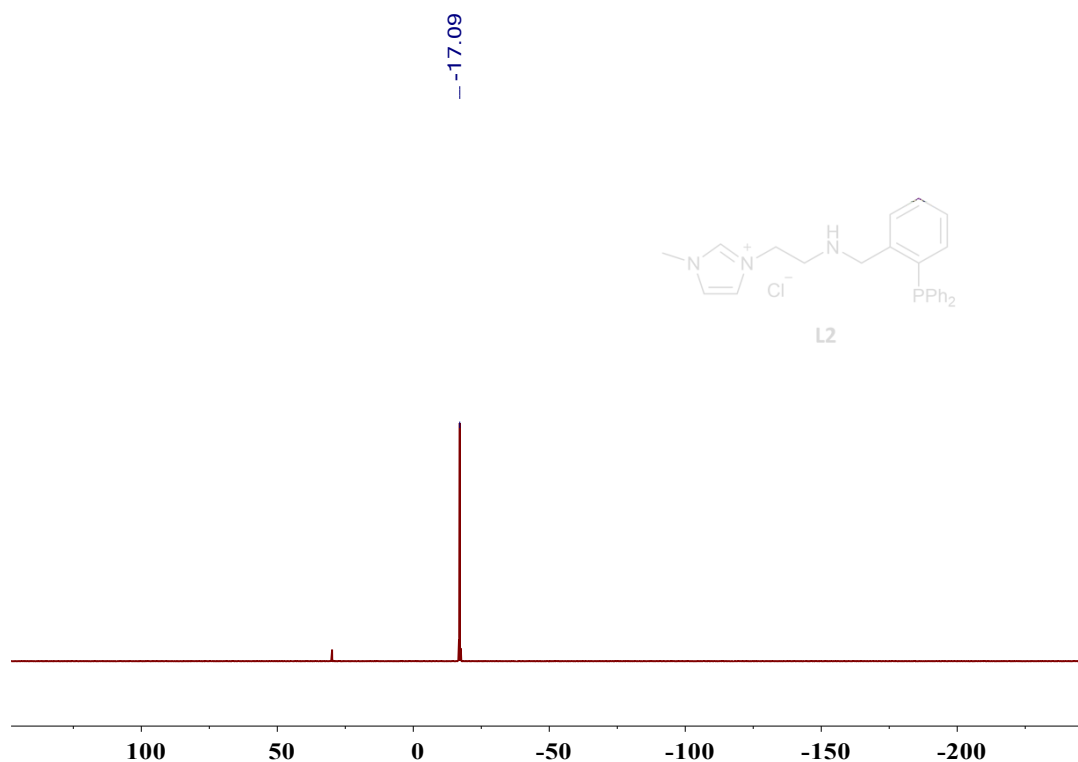

**Figure S2.**  $^{31}\text{P}$  NMR spectrum of **L2** ligand (162.0 MHz,  $\text{DMSO-}d_6$ ).

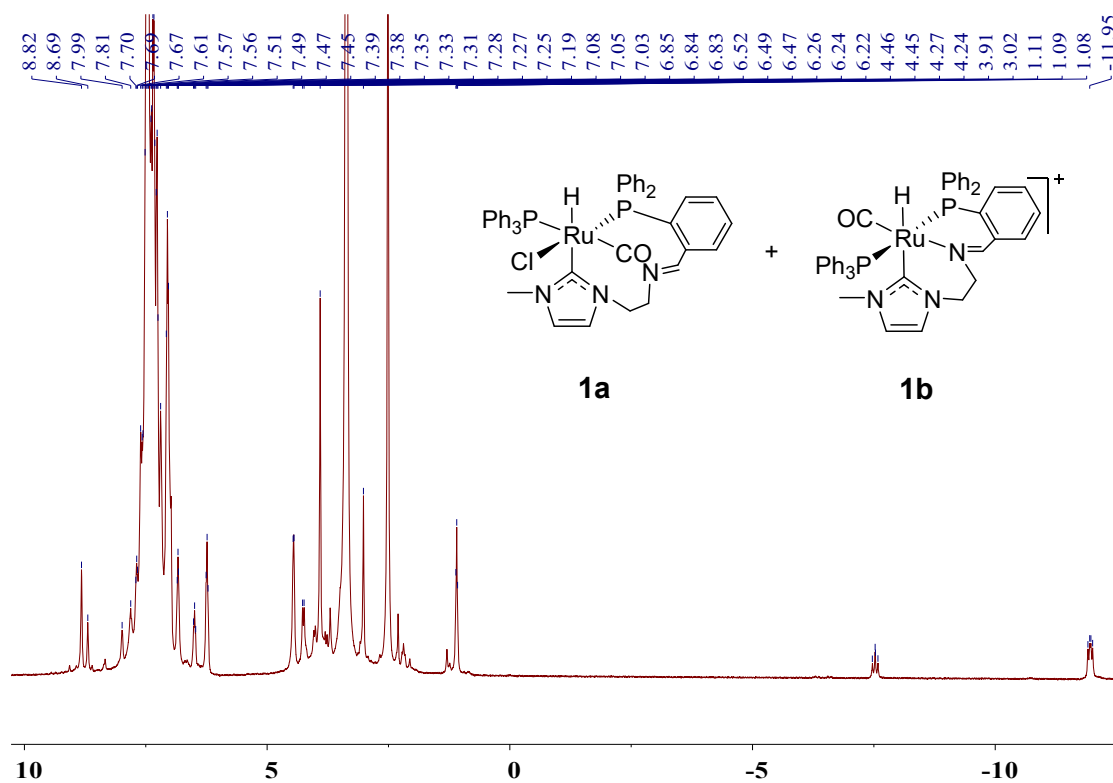

**Figure S3.**  $^1\text{H}$  NMR spectrum of complex **1** (400.1 MHz,  $\text{DMSO-}d_6$ ).

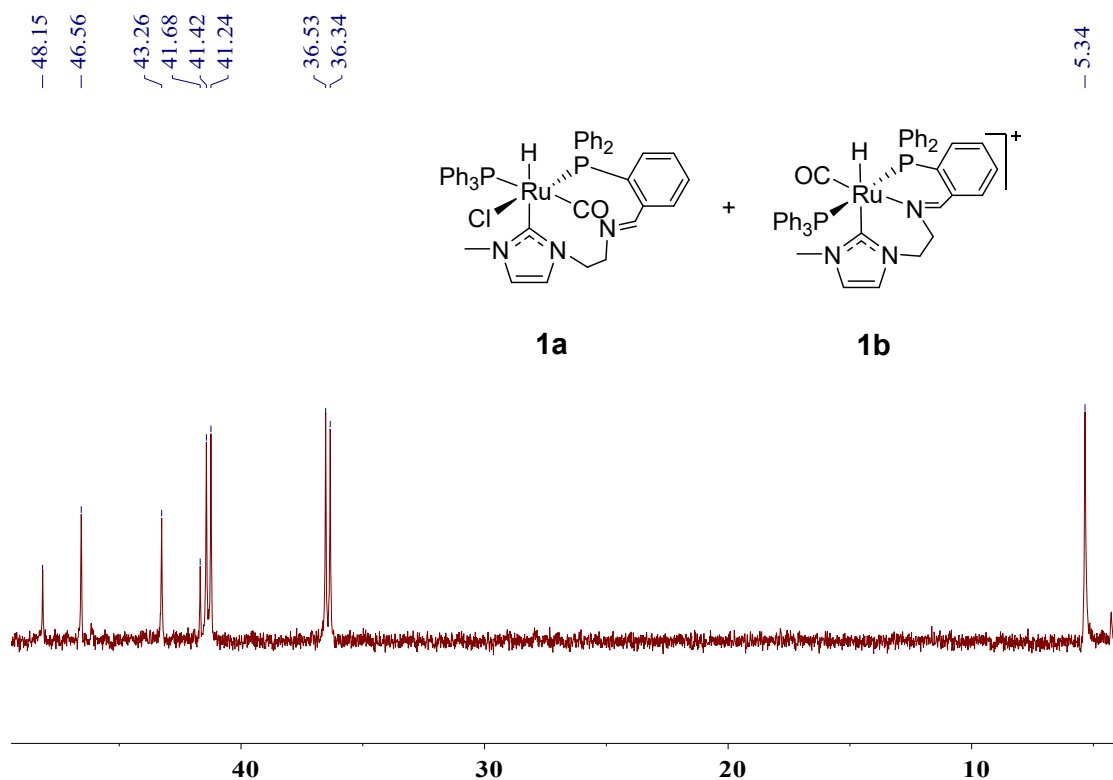

**Figure S4.**  $^{31}\text{P}$  NMR spectrum of complex **1** (162.0 MHz,  $\text{DMSO-}d_6$ ).

The characteristic signals of hydride in complex **1** showed two groups of peaks at  $-11.96$  ppm (dd,  $J = 24.3, 14.6$  Hz, 1H) and  $-7.53$  ppm (dd,  $J = 24.8, 22.0$  Hz, 1H) in the  $^1\text{H}$  NMR spectrum (Figure S3). The  $^{31}\text{P}$  NMR spectrum also gave two sets of doublets (Figure S4), one was located at 47.4 and 42.5 ppm (d,  $J = 256.5$  Hz), while the other was at 41.3 and 36.4 ppm (d,  $J = 30.4$  Hz).

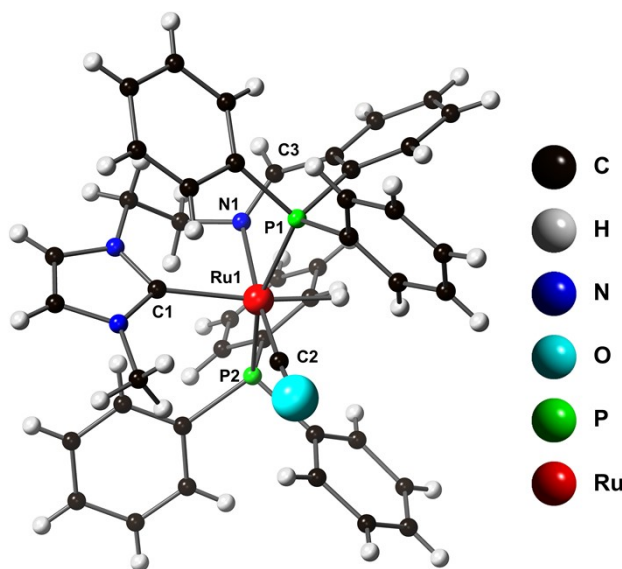

**Figure S5.** The single crystal structure of complex **1b** (This structure was obtained from Reference

2). Selected bond lengths (Å): Ru1-C1=2.179, Ru1-N1=2.178, Ru1-P1=2.315, Ru1-P2=2.379, Ru1-C2=1.832. Selected bond angles (°): C1-Ru1-P1=97.682, C1-Ru1-N1=84.371, N1-Ru1-P1=83.316, C3-N1-Ru1= 129.543.

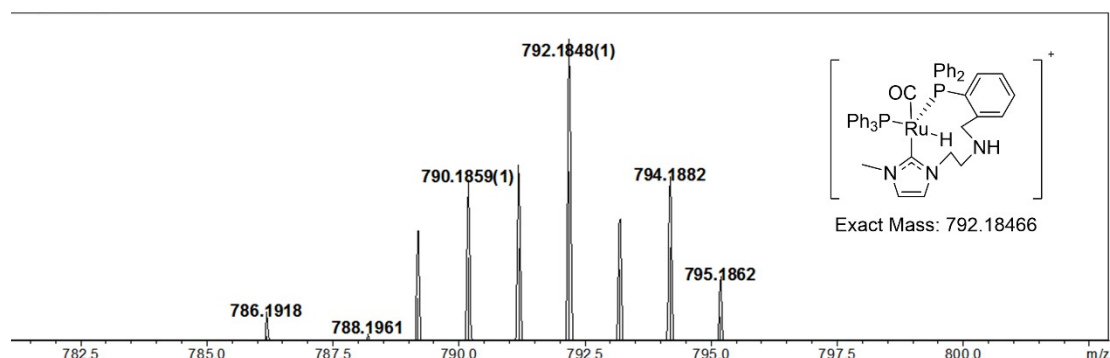

**Figure S6.** ESI-MS spectrum of complex **2**.

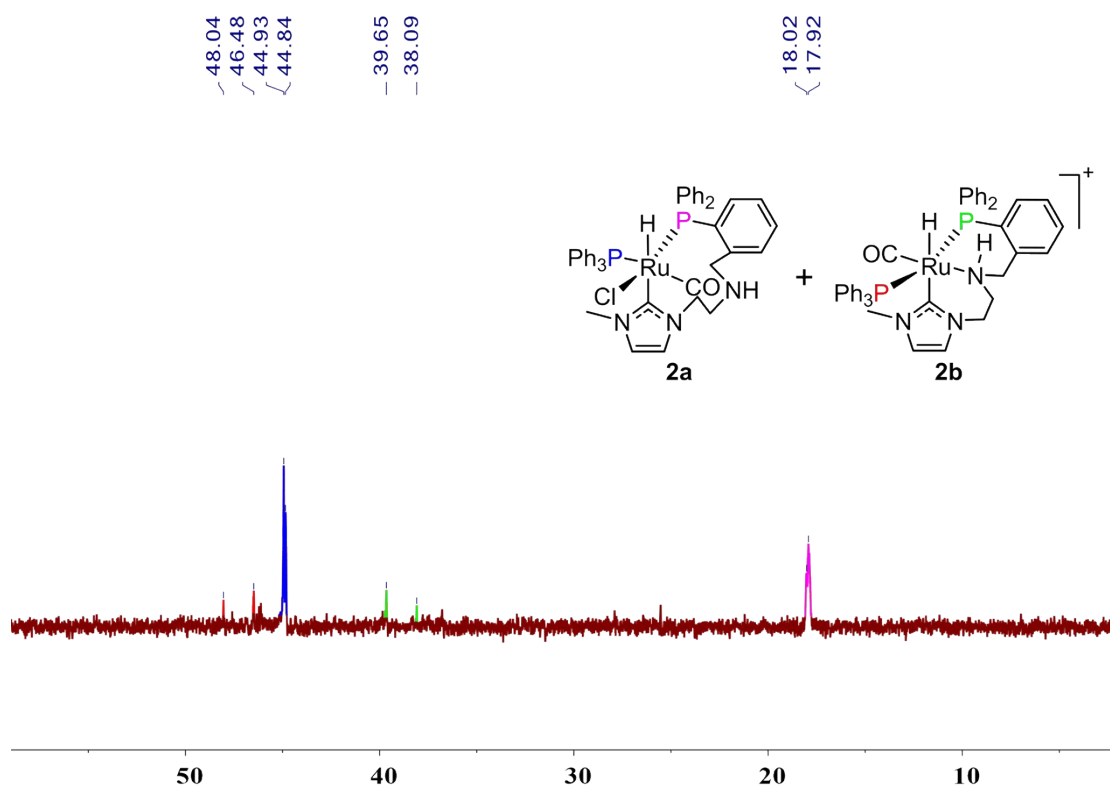

**Figure S7.**  $^{31}\text{P}$  NMR spectrum of complex **2** (162.0 MHz,  $\text{DMSO-}d_6$ ) (blue and purple peaks represent P in complex **2a**, red and green peaks represent P in complex **2b**).

The  $^{31}\text{P}$  spectrum of complex **2** (Fig. N1) indicates there existed a similar equilibrium in complex **2** just like that of complex **1**. But the trend for complex **2** was significantly lower than that of complex **1**. As reveals in Fig. S5, the C3-N1-Ru1 bond angle of complex **1b** is  $129^\circ$ . Compared with the N atom of  $-\text{CH}=\text{N}-$  moiety in CNP ligand, the N atom of N-H moiety in Ru-CN(H)P complex **2** is  $\text{sp}^3$  hybridization and has a smaller bond angle (around  $108^\circ$ ). Therefore, we supposed that the N atom of N-H moiety in CN(H)P ligand was more difficult to form a coordination bond with Ru center.



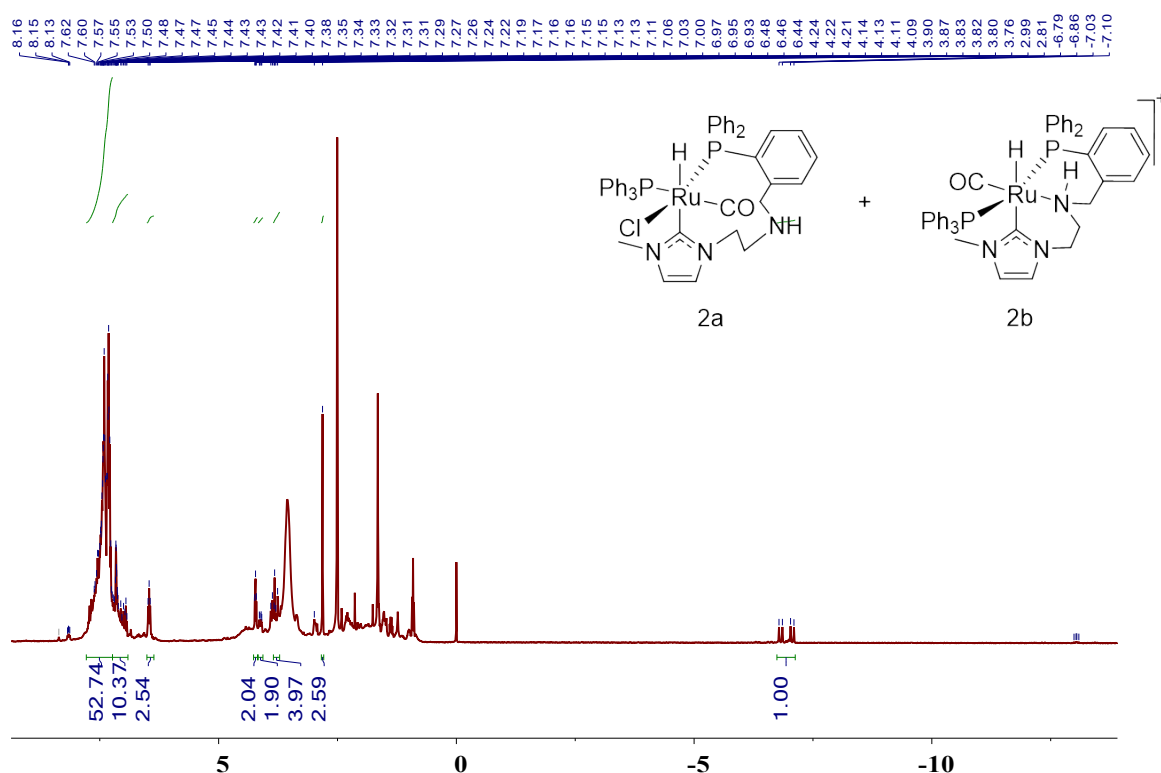

**Figure S8.**  $^1\text{H}$  NMR spectrum of complex **2** (400.1 MHz,  $\text{DMSO}-d_6$ ).

The  $^1\text{H}$  NMR spectrum (Fig. S8) of the hydride in complex **2** exhibited two sets of doublet of doublets. One was located at  $-6.94$  ppm (dd,  $J = 29.0$  Hz), indicating that two P atom occupied in *cis*-position of the hydride. And the other was located at  $-13.04$  ppm (dd,  $J = 16.0$  Hz), which indicated that the hydride was also located in the *cis*-position of two phosphorus atoms.

**Table S1.** Comparison of stability of representative Ru catalysts for the hydrogenation of  $\text{CO}_2^a$ .

| Cat.                                                                                             | T (°C) | Time <sub>start</sub> (h) | TOF <sub>start</sub> ( $\text{h}^{-1}$ ) | Time <sub>total</sub> (h) | TOF <sub>average</sub> ( $\text{h}^{-1}$ ) | TON    | Ref.      |
|--------------------------------------------------------------------------------------------------|--------|---------------------------|------------------------------------------|---------------------------|--------------------------------------------|--------|-----------|
| <b>1</b><br>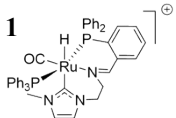  | 140    | 4                         | 700                                      | 96                        | 620                                        | 59500  | This work |
|                                                                                                  | 200    | 4                         | 5725                                     | 48                        | 3520                                       | 169000 |           |
| <b>2</b><br>  | 140    | 4                         | 418                                      | 16                        | 334                                        | 5340   | This work |
| <b>S1</b><br> | 100    | 2                         | 97                                       | 20                        | 20                                         | 400    | [9]       |
| <b>S2</b><br> | 100    | —                         | —                                        | 24                        | 17                                         | 407    | [10]      |



(entry 8), 16 h (entry 9), 72 h (entry 11); TOF is an average value and calculated according to the reaction time.

The effect of the various bases on the reaction were investigated (Table 1, entry 1; Table S2, entry 1-3), the results indicated the presence of base was of vital importance, the highest TOF ( $699 \text{ h}^{-1}$ ) was given in the presence of CsOH (Table 1, entry 1).

When  $\text{H}_2$  was solely used with  $\text{CsHCO}_3$  as the base, considerable amount of formate was observed (Table S2, entry 6). However, a negligible amount of formate was obtained when  $\text{Cs}_2\text{CO}_3$  was used to substitute  $\text{CsHCO}_3$  (Table S2, entry 7). The phenomenon was in consistent with the reported, indicating that  $\text{HCO}_3^-$  could serve as both the source of  $\text{CO}_2$  and the base.<sup>16</sup>

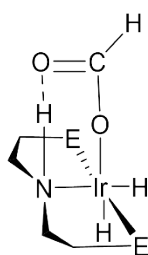

**Figure S9.** Six-membered ring between Ir complex and  $\text{CO}_2$ .<sup>17</sup>

The metal complexes with meridional configuration could easily form six-membered ring transition state with  $\text{CO}_2$  (Fig. S9).<sup>17</sup>

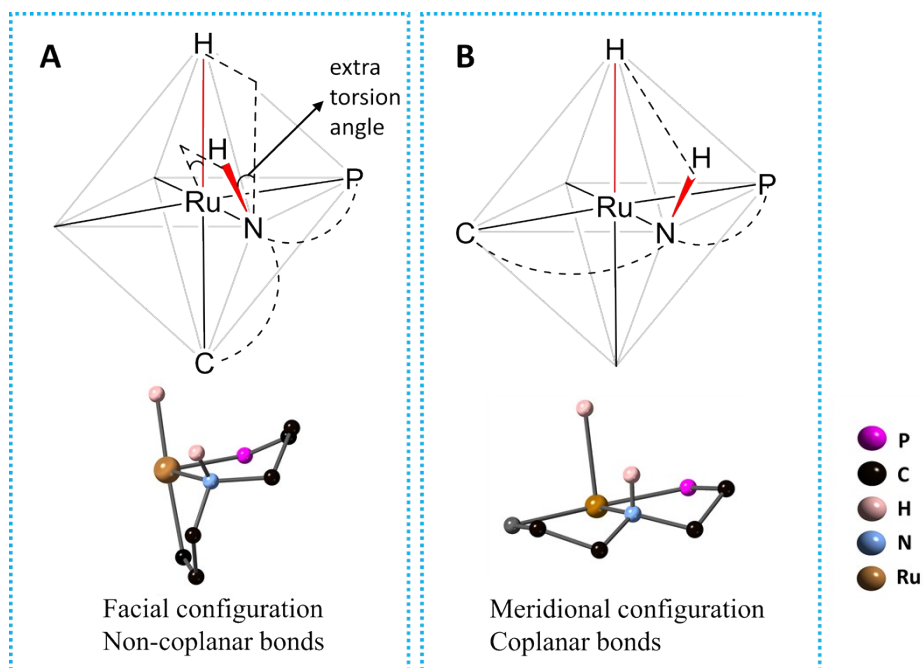

**Figure S10.** Schematic diagrams of the N-H bond and the Ru-H in different coordination forms. (A) Facial configuration; (B) Meridional configuration.

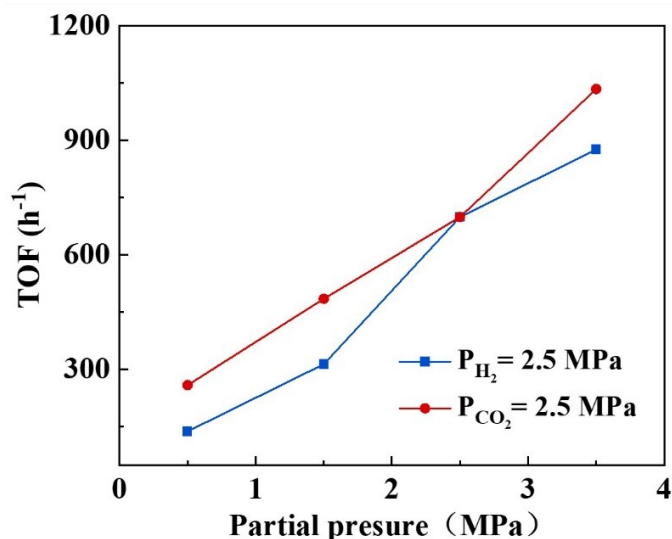

**Figure S11.** Pressure-dependent reaction rates<sup>a</sup>.

<sup>a</sup> General conditions: T = 140 °C, complex **1** (0.1 μmol), base (CsOH, 10 mmol), P(H<sub>2</sub>) or P(CO<sub>2</sub>) = 2.5 MPa, V(THF)/V(H<sub>2</sub>O) (1:5, 6 ml), reaction time = 4 h.

**Table S3.** CO<sub>2</sub> hydrogenation performance of complex **1** under different pressure or in the presence of different additive<sup>a</sup>.

| entry          | Additive                                         | H <sub>2</sub> :CO <sub>2</sub> (MPa) | pKa (conjugated acid) | additive:cat | TOF (h <sup>-1</sup> ) |
|----------------|--------------------------------------------------|---------------------------------------|-----------------------|--------------|------------------------|
| 1              | N/A                                              | 0.5:2.5                               | N/A                   | N/A          | 259                    |
| 2              | N/A                                              | 1.5:2.5                               | N/A                   | N/A          | 485                    |
| 3              | N/A                                              | 2.5:2.5                               | N/A                   | N/A          | 700                    |
| 4              | N/A                                              | 3.5:2.5                               | N/A                   | N/A          | 1030                   |
| 5              | N/A                                              | 2.5:0.5                               | N/A                   | N/A          | 138                    |
| 6              | N/A                                              | 2.5:1.5                               | N/A                   | N/A          | 314                    |
| 7              | N/A                                              | 2.5:3.5                               | N/A                   | N/A          | 876                    |
| 8 <sup>b</sup> | N/A                                              | 1.0:1.0                               | N/A                   | N/A          | 170                    |
| 9              | N/A                                              | 1.0:1.0                               | N/A                   | N/A          | 119                    |
| 10             | N/A                                              | 2.0:1.0                               | N/A                   | N/A          | 244                    |
| 11             | N/A                                              | 1.0:2.0                               | N/A                   | N/A          | 321                    |
| 12             | KNO <sub>3</sub>                                 | 2.5:2.5                               | -1.76                 | 50000        | 675                    |
| 13             | K <sub>2</sub> SO <sub>4</sub>                   | 2.5:2.5                               | 1.99                  | 50000        | 1190                   |
| 14             | NaBF <sub>4</sub>                                | 2.5:2.5                               | 0.5                   | 50000        | 821                    |
| 15             | NaOAc                                            | 2.5:2.5                               | 6.74                  | 50000        | 1960                   |
| 16             | C <sub>6</sub> H <sub>5</sub> CO <sub>2</sub> Na | 2.5:2.5                               | 4.21                  | 50000        | 1690                   |
| 17             | CF <sub>3</sub> COONa                            | 2.5:2.5                               | 0.23                  | 50000        | 976                    |
| 18             | Hg                                               | 2.5:2.5                               | N/A                   | 6000         | 632                    |

<sup>a</sup> General conditions: Complex **1** (0.1 μmol), base = CsOH (10 mmol), V(THF)/V(H<sub>2</sub>O) = 1:5 (6 ml), reaction time = 4 h. T = 140 °C; <sup>b</sup>H<sub>2</sub>:CO<sub>2</sub>:N<sub>2</sub>=1.0:1.0:1.0

To see if the higher total pressure could increase the TOF, the ratio of H<sub>2</sub> and CO<sub>2</sub> was kept constant, while N<sub>2</sub> (inert gas) was added to increase the total pressure. As a result, the TOF for formate would increase by simply increasing the total pressure (Table S3, entry 8, 9). However, the TOF could increase much more when the total pressure was increased by increasing the partial pressure of H<sub>2</sub> or CO<sub>2</sub> (Table S3, entry 8-11). Moreover, to see the impacts of only changing the partial pressure of H<sub>2</sub> or CO<sub>2</sub> on the TOF, N<sub>2</sub> was added to keep the total pressure constant. The TOF would also decrease by lowering the partial pressure of H<sub>2</sub> or CO<sub>2</sub>, when the total pressure was kept constant (Table S3, entry 8, 10-11). Therefore, the TOF is directly related to the total pressure, partial pressure of H<sub>2</sub> and CO<sub>2</sub>.

Moreover, the experimental results showed that the addition of OAc<sup>-</sup> could significantly increase the activity of Ru-CNP complex **1** (Table S3, entry 15).

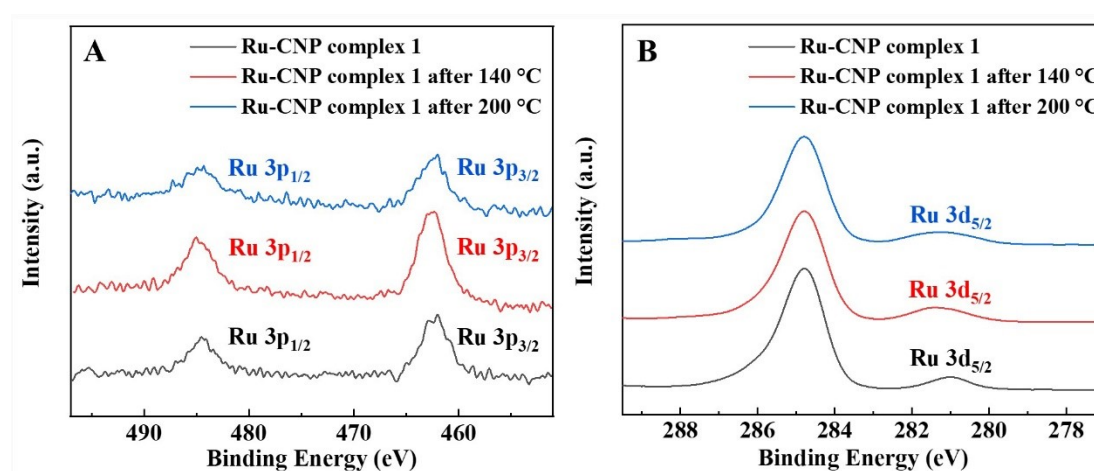

**Figure S12.** (A) Ru 3p and (B) Ru 3d XPS spectra of Ru-CNP complex **1** before (black) and after CO<sub>2</sub> hydrogenation reaction at 140 °C (red) and 200 °C (blue) for 4 h.

We have carried out mercury poisoning experiments and XPS tests to rule out the influence of nanoparticle catalysis. If there were Ru nanoparticles during the reaction, they would form amalgam and out of action in the mercury poisoning experiments.<sup>18</sup> The TOF was 632 h<sup>-1</sup> for Ru-CNP complex **1** in the mercury experiment (Table S3, entry 18). Compared with the original value (TOF = 700 h<sup>-1</sup>, Table 1, entry 1), the activity of did not show significantly decrease, which excluded the influence of nanoparticle catalysis. Moreover, as revealed in the XPS spectra (Fig. S12), the Ru 3p<sub>3/2</sub> and 3d<sub>5/2</sub> spectra of Ru-CNP complex **1** after CO<sub>2</sub> hydrogenation reactions at 140 °C and 200 °C didn't show the features of Ru<sup>0</sup>,<sup>19</sup> manifesting that the Ru-CNP complex **1** would not be reduced to Ru<sup>0</sup> metal during the reaction, which also ruled out the involvement of nanoparticle catalysis.

**Table S4.** CO<sub>2</sub> hydrogenation performance of complex **1** in the presence of NaOAc<sup>a</sup>.

| entry | cat. | Additive | base | TOF (h <sup>-1</sup> ) |
|-------|------|----------|------|------------------------|
| 1     | N/A  | NaOAc    | CsOH | N/A                    |
| 2     | 1    | NaOAc    | N/A  | 368                    |

|                |   |       |      |      |
|----------------|---|-------|------|------|
| 3              | 1 | NaOAc | CsOH | 1960 |
| 4 <sup>b</sup> | 1 | NaOAc | CsOH | 1540 |
| 5 <sup>b</sup> | 1 | NaOAc | CsOH | 1310 |
| 6 <sup>c</sup> | 1 | NaOAc | CsOH | 1010 |
| 7 <sup>c</sup> | 1 | NaOAc | CsOH | 1340 |
| 8 <sup>c</sup> | 1 | NaOAc | CsOH | 2480 |
| 9 <sup>d</sup> | 1 | N/A   | CsOH | 704  |

<sup>a</sup> General conditions: Complex **1** (0.1 μmol), reaction time = 4 h, T = 140 °C, base = CsOH (10 mmol), V(THF)/V(H<sub>2</sub>O) = 1:5 (6 ml), H<sub>2</sub> : CO<sub>2</sub> = 2.5:2.5 (MPa), additive (5 mmol); <sup>b</sup> reaction time = 8 h (entry 4), 16 h (entry 5); <sup>c</sup> 1 mmol additive (entry 6), 2 mmol additive (entry 7), 10 mmol additive (entry 8); <sup>d</sup> 20 mmol CsOH.

Blank experiment showed that no formate was detected in the absence of ruthenium complex (Table S4, entry 1), which proved that NaOAc could not achieve the CO<sub>2</sub> hydrogenation.

The base (10 mmol CsOH) in the system was greatly excessive when NaOAc (2-10 mmol) was added. So if NaOAc merely provided a more basic environment, it shouldn't have such a huge impact on the TOF. To verify our speculation, addition 10 mmol CsOH was added in the system. 20 mmol CsOH could provide a more basic environment than the mixture of 10 mmol CsOH and 10 mmol NaOAc (2480 h<sup>-1</sup>, Table S4, entry 8), because the alkalinity of NaOAc is far less than that of CsOH. The TOF (700 h<sup>-1</sup>, Table S4, entry 9) in 20 mmol CsOH didn't show obviously enhancement than the original value (700 h<sup>-1</sup>, Table 1, entry 1), which affirmed that a more basic environment could not ensure a much better activity. According to the relevant literature,<sup>20</sup> it is more likely that OAc<sup>-</sup> could coordinate with Ru centers in certain way and play an action as the internal base during the reaction, which then had profoundly influence the catalytic activity.

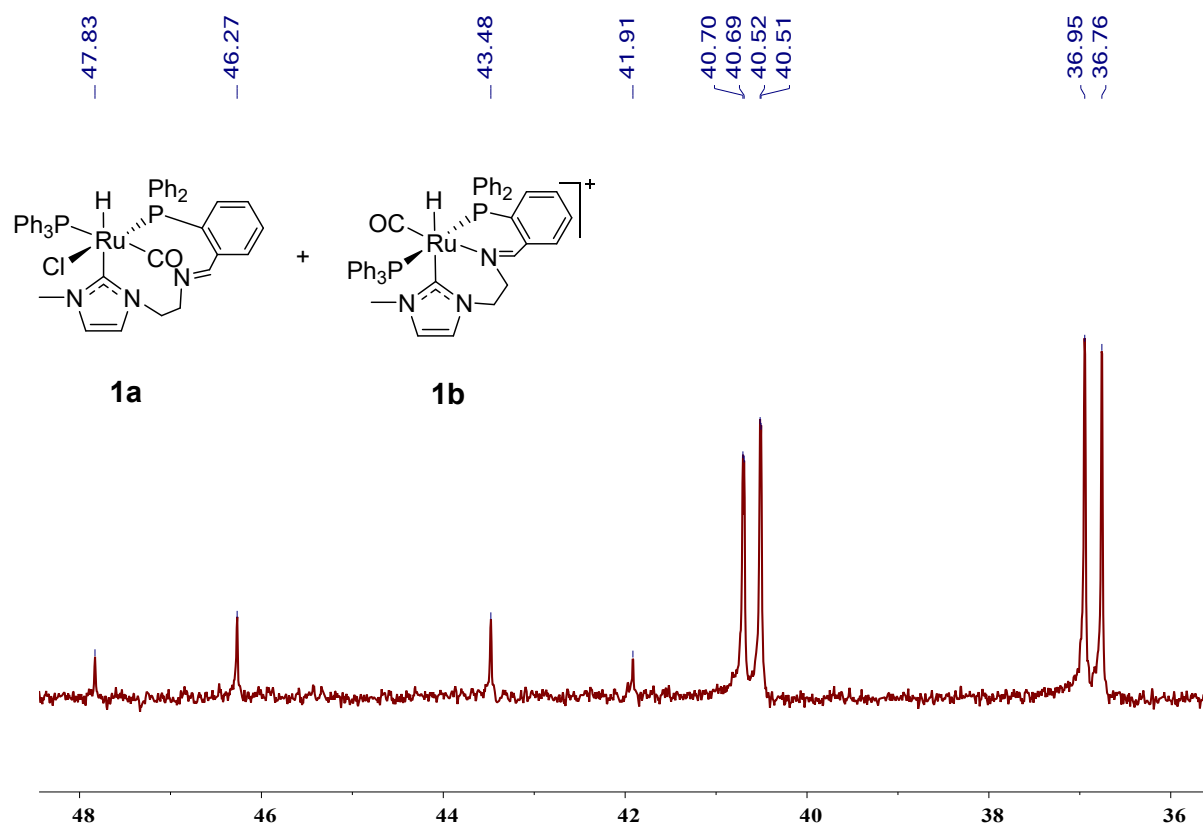

**Figure S13.**  $^{31}\text{P}$  NMR spectrum of pure complex **1a** dissolved in  $\text{CD}_2\text{Cl}_2$  for 2 h (162.0 MHz,  $\text{CD}_2\text{Cl}_2$ ).

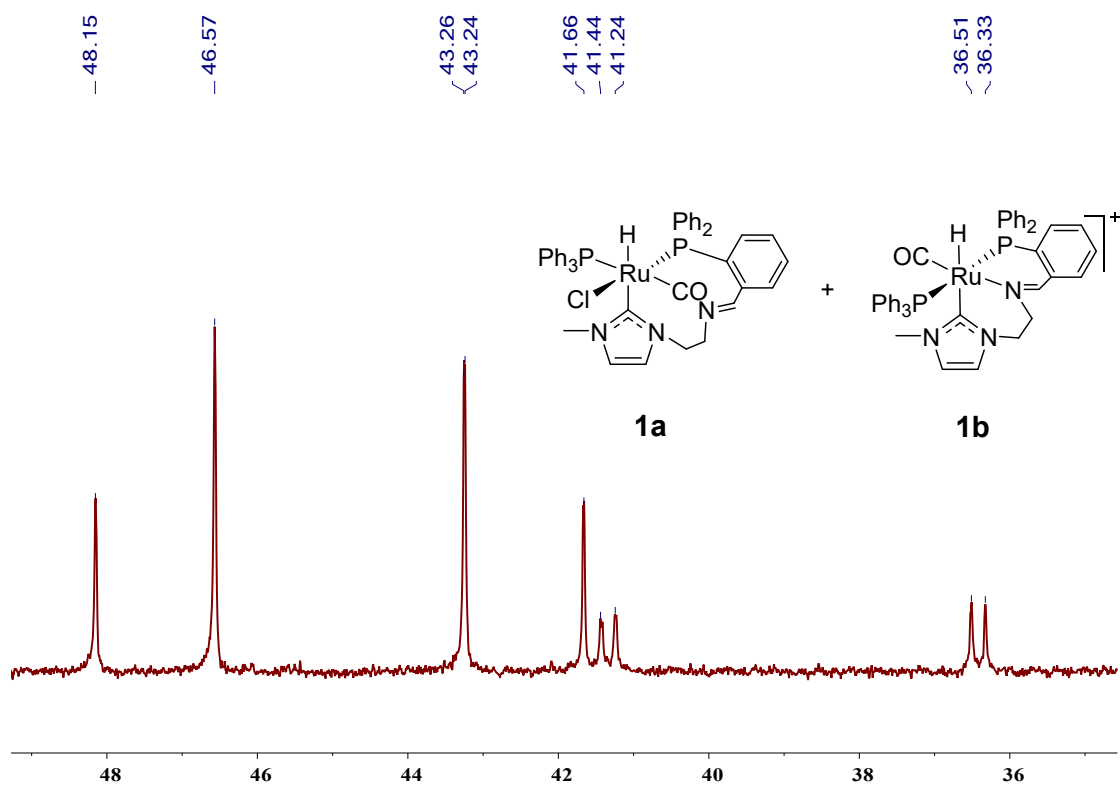

**Figure S14.**  $^{31}\text{P}$  NMR spectrum of pure complex **1b** dissolved in  $\text{DMSO}-d_6$  for 2 h (162.0 MHz,  $\text{DMSO}-d_6$ ).

Even though we could obtain pure complex **1b** by column chromatography. There would still be an equilibrium between **1a** and **1b** (Fig. S13-S14) when pure **1a** or pure **1b** was dissolved in the solution ( $\text{CH}_2\text{Cl}_2$  or  $\text{DMSO}-d_6$ ).

Therefore, we can't completely rule out complex **1a** as a catalytically competent species. But as revealed by the  $^{31}\text{P}$  NMR spectra, most of the complex **1a** transformed to **1b** during the  $\text{CO}_2$  hydrogenation reaction (Fig. 2), which suggested that complex **1b** is more likely to be the catalytically competent species.

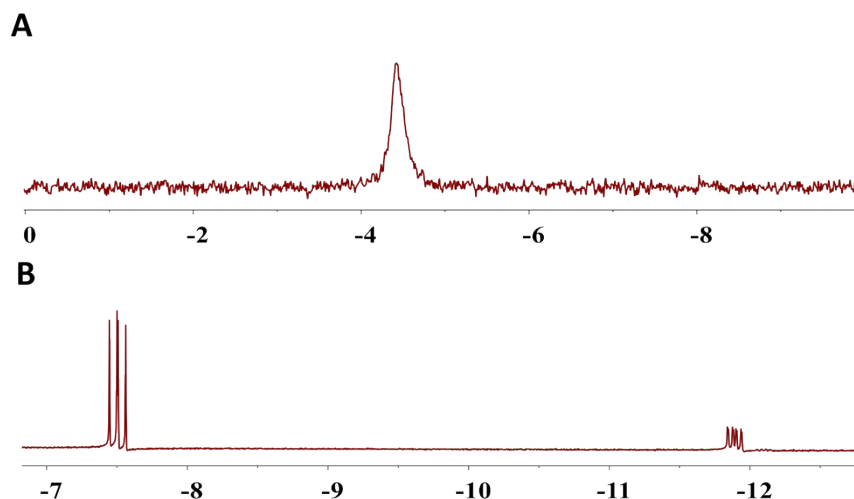

**Figure S15.** NMR spectra of the reaction mixture: (A)  $^{31}\text{P}$  NMR of the free  $\text{PPh}_3$ ; (B) upfield of  $^1\text{H}$  NMR spectra of the reaction mixture.

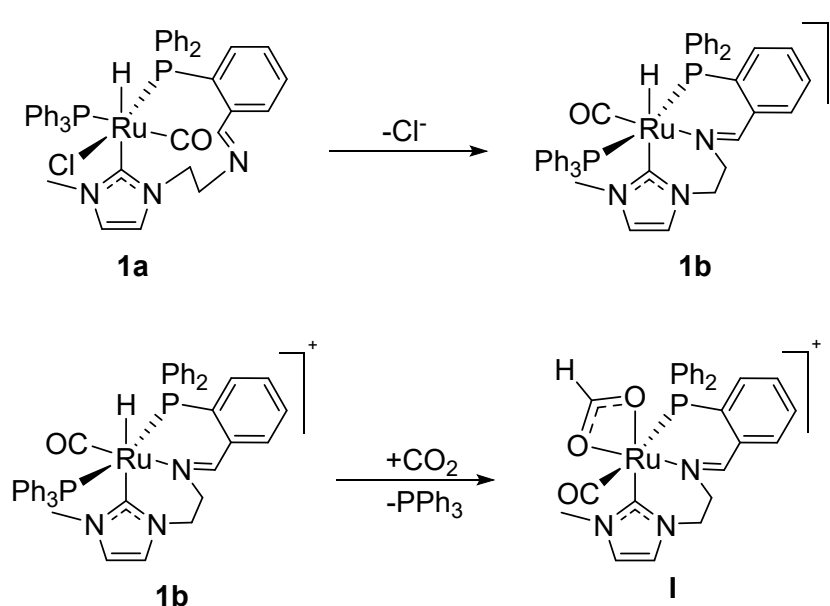

**Scheme S6.** Summary for the stoichiometric reactions.

In the stoichiometric reactions,  $^{31}\text{P}$  NMR spectra displayed that most of the complex **1a** transformed to **1b** during the reaction (Fig. 2A-B). Moreover, the signal of the free



PPh<sub>3</sub> was detected (Fig. S15A), and a signal of the new species appeared at +45 ppm (Fig. 2B), which was not observed without CO<sub>2</sub>. At the same time, <sup>1</sup>H NMR spectra showed that the signal located at 8.75 ppm was attributed to HCOO<sup>-</sup> (Fig. 2C). So it was reasonable to deduce that the new species was the formate-chelated Ru complex (intermediate **I**), which was formed by the substitution of PPh<sub>3</sub> with HCOO<sup>-</sup>.

## References

1. Y. Li, X. Yu, Y. Wang, H. Fu, X. Zheng, H. Chen and R. Li, *Organometallics*, 2018, **37**, 979-988.
2. X. He, Y. Li, H. Fu, X. Zheng, H. Chen, R. Li and X. Yu, *Organometallics*, 2019, **38**, 1750-1760.
3. R. Tanaka, M. Yamashita and K. Nozaki, *J. Am. Chem. Soc.*, 2009, **131**, 14168-14169.
4. G. A. Filonenko, E. J. Hensen and E. A. Pidko, *Catal. Sci. Technol.*, 2014, **4**, 3474-3485.
5. S. Takaoka, A. Eizawa, S. Kusumoto, K. Nakajima, Y. Nishibayashi and K. Nozaki, *Organometallics*, 2018, **37**, 3001-3009.
6. A. Eizawa, S. Nishimura, K. Arashiba, K. Nakajima and Y. Nishibayashi, *Organometallics*, 2018, **37**, 3086-3092.
7. D. Jantke, L. Pardatscher, M. Drees, M. Cokoja, W. A. Herrmann and F. E. Kühn, *ChemSusChem*, 2016, **9**, 2849-2854.
8. G. A. Filonenko, D. Smykowski, B. M. Szyja, G. Li, J. Szczygiel, E. J. Hensen and E. A. Pidko, *ACS Catal.*, 2015, **5**, 1145-1154.
9. T. T. Thai, B. Therrien and G. S. Fink, *J. Organomet. Chem.*, 2009, **694**, 3973-3981.
10. Z. Dai, Q. Luo, H. Cong, J. Zhang and T. Peng, *New J. Chem.*, 2017, **41**, 3055-3060.
11. M. Scott, B. Blas Molinos, C. Westhues, G. Franciò and W. Leitner, *ChemSusChem*, 2017, **10**, 1085-1093.
12. J. Kothandaraman, M. Czaun, A. Goeppert, R. Haiges, J. P. Jones, R. B. May, G. S. Prakash and G. A. Olah, *ChemSusChem*, 2015, **8**, 1442-1451.
13. C. A. Huff and M. S. Sanford, *ACS Catal.*, 2013, **3**, 2412-2416.
14. S. Sanz, A. Azua and E. Peris, *Dalton Trans.*, 2010, **39**, 6339-6343.
15. A. Weilhard, S. P. Argent and V. Sans, *Nat. Commun.*, 2021, **12**, 231.
16. C. Guan, Y. Pan, E. P. L. Ang, J. Hu, C. Yao, M. H. Huang, H. Li, Z. Lai and K. W. Huang, *Green Chem.*, 2018, **20**, 4201-4205.
17. T. J. Schmeier, G. E. Dobereiner, R. H. Crabtree and N. Hazari, *J. Am. Chem. Soc.*, 2011, **133**, 9274-9277.
18. G. M. Whitesides, M. Hackett, R. L. Brainard, J. P. P. Lavalleye, A. F. Sowinski, A. N. Izumi, S. S. Moore, D. W. Brown and E. M. Staudt, *Organometallics*, 1985, **4**, 1819-1830.
19. D. J. Morgan, *Surf. Interface Anal.*, 2015, **47**, 1072-1079.
20. J. L. Drake, C. M. Manna and J. A. Byers, *Organometallics*, 2013, **32**, 6891-6894.
